# Supplementary material for: Vinpocetine alleviates lung inflammation via macrophage inflammatory protein-1β inhibition in an ovalbumin-induced allergic asthma model
Source: PubMed Central journal article supplement (PMC8084130; doi:10.1371/journal.pone.0251012), 2021-04-29

PDE1A

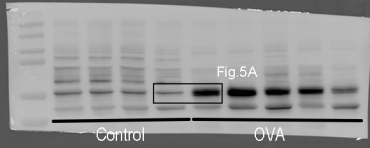

$\beta$ -Actin

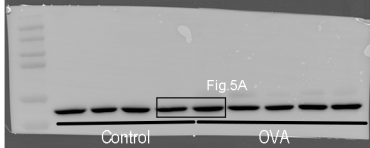

PDE1B

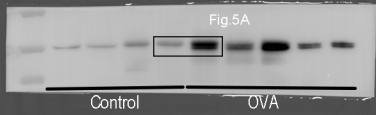

$\beta$ -Actin

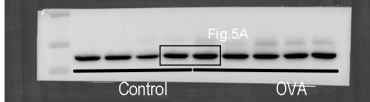

PDE1C

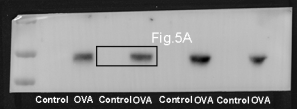

$\beta$ -Actin

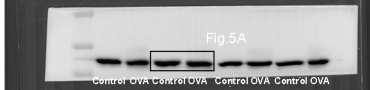

Supplement: pone.0251012.s003.pdf [file pone.0251012.s003.pdf]
